# Supplementary material for: Active and stable carbon nanotube/nanoparticle composite electrocatalyst for oxygen reduction
Source: PubMed Central journal article supplement — Nat Commun. 2013 May 28;4:1922–. doi: 10.1038/ncomms2944 (PMC3674270; doi:10.1038/ncomms2944), 2013-05-28
Supplement: ncomms2944-s1.pdf [file ncomms2944-s1.pdf]

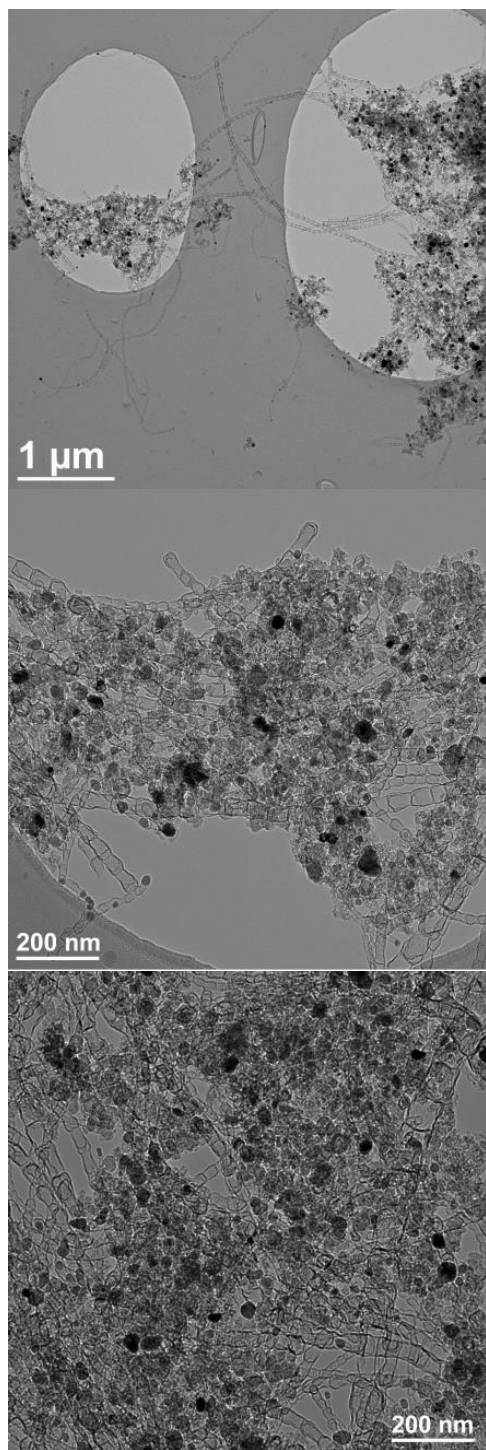

**Supplementary Figure S1.** CNT/CNP composite: *ca.* 10 μm CNTs distributed homogeneously in CNPs with intimate contact between CNT and CNP maintained.

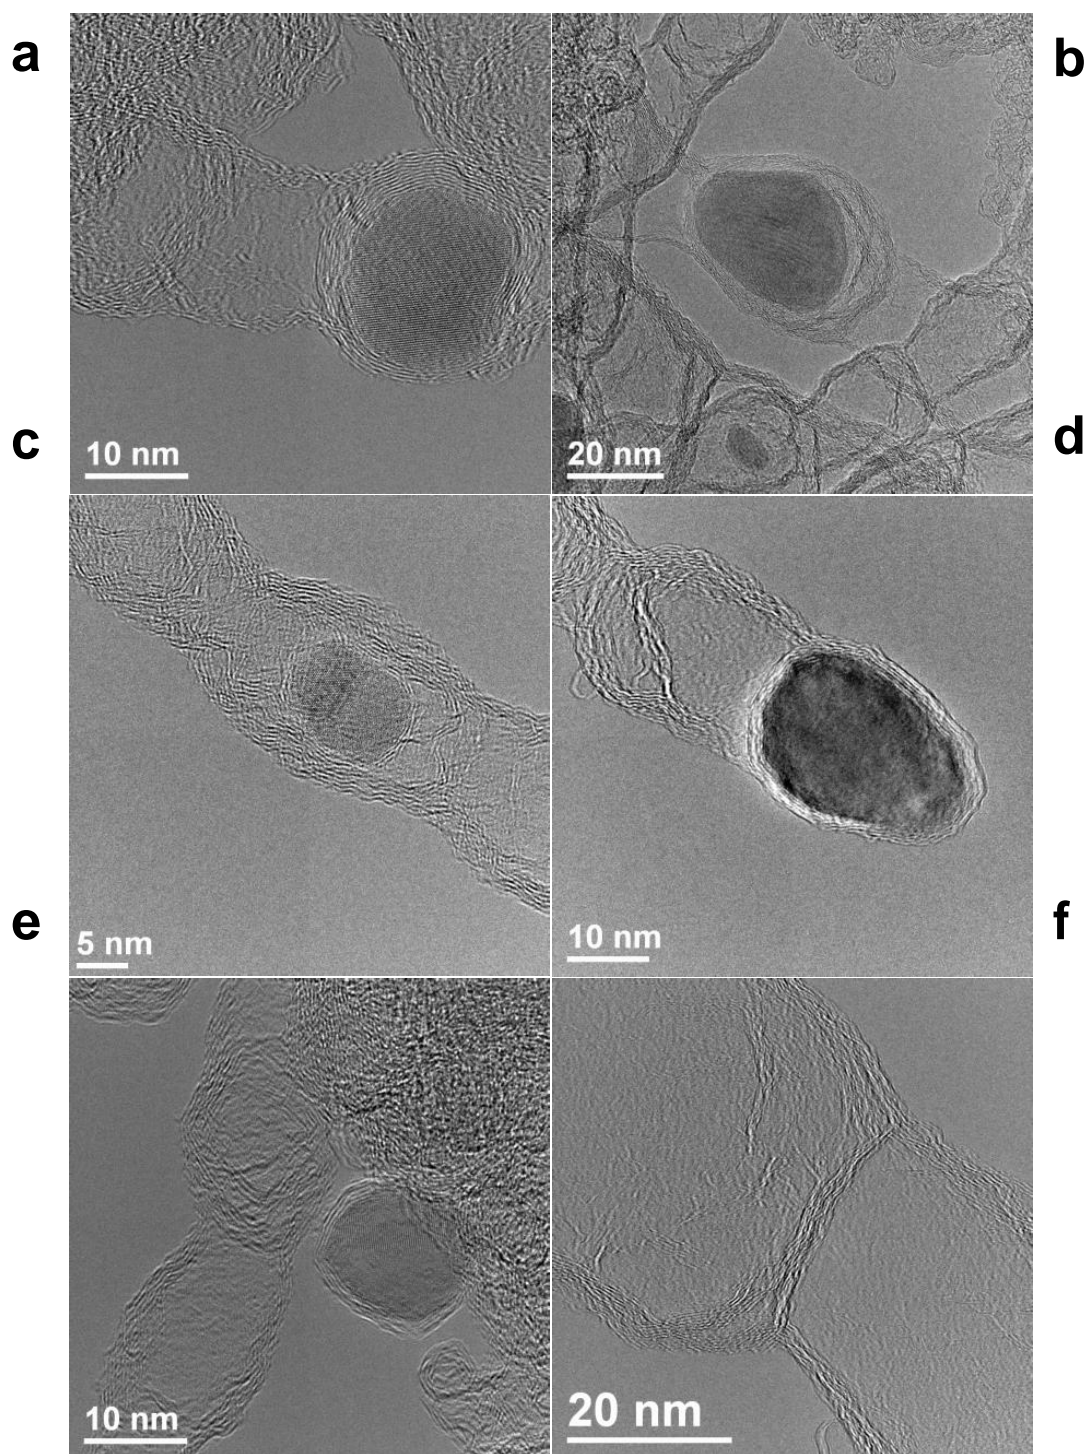

**Supplementary Figure S2.** TEM of CNTs in N-Fe-CNT/CNP catalyst showing Fe nanoparticles encapsulated in several carbon nanoshells in nanotubes or individual particles; graphene defects are also shown.

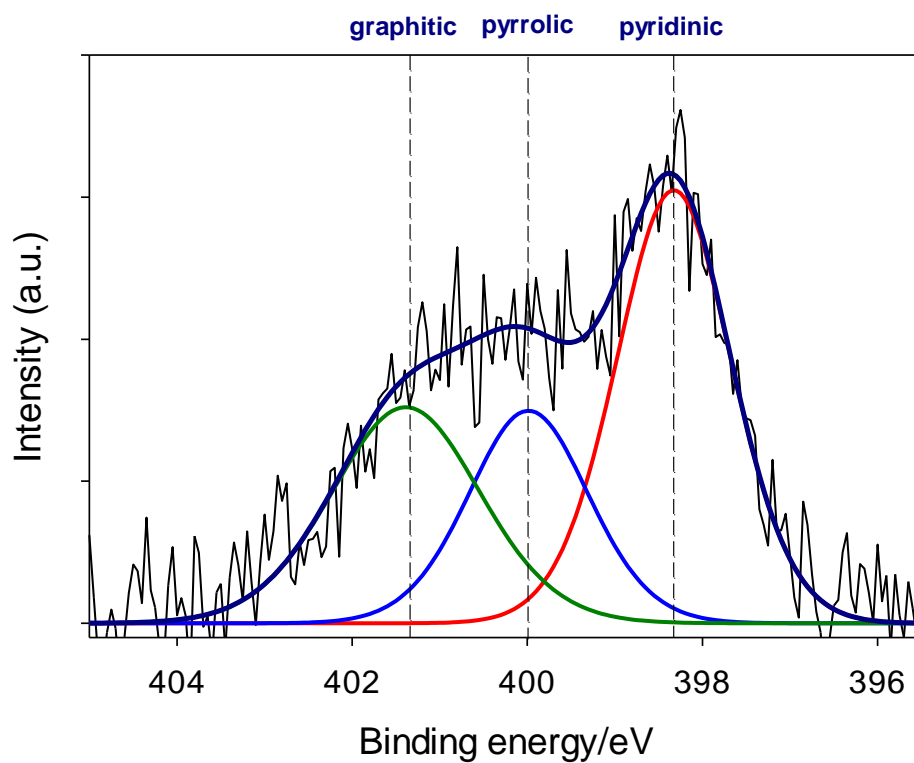

**Supplementary Figure S3.** N 1s XPS spectra of N-Fe-CNT/CNP catalyst. Thin black line: measured data; thick dark blue line: fitted curve. Deconvoluted nitrogen peaks: pyridinic-N (398.3 eV, red line); pyrrolic-N (400.0 eV, blue line); graphitic-N (401.1 eV, green line).

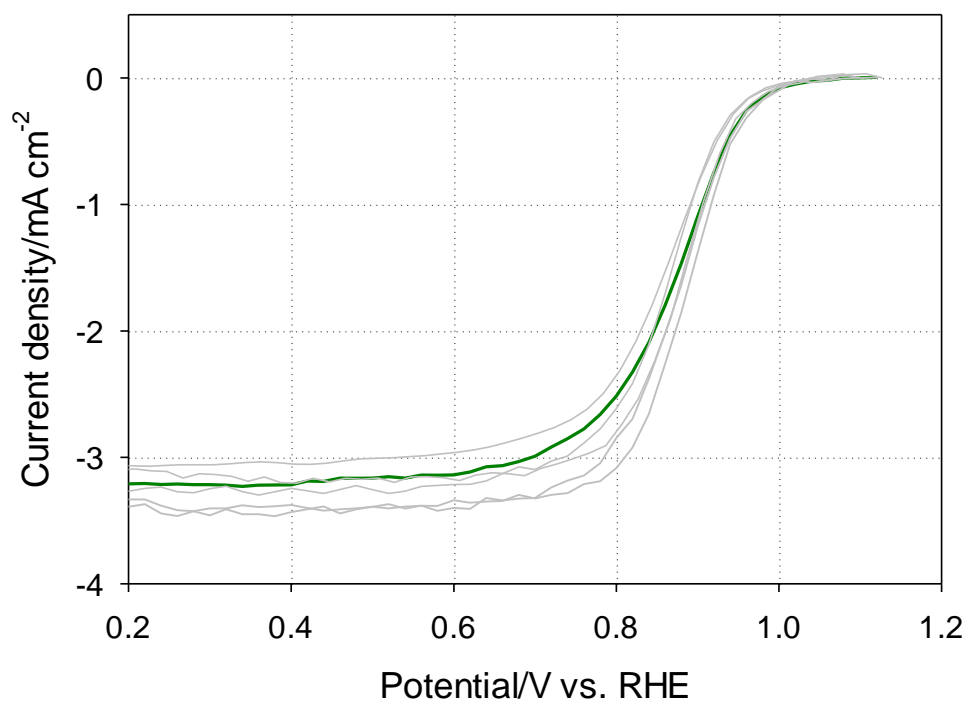

**Supplementary Figure S4.** Steady-state ORR polarization plots recorded with N-Fe-CNT/CNP catalysts from six different syntheses. Disk loading  $0.2 \text{ mg cm}^{-2}$ ;  $E_{1/2} = 0.87(3) \pm 0.01(2)$ . Plot in green has been used in Fig. 2a in the manuscript.

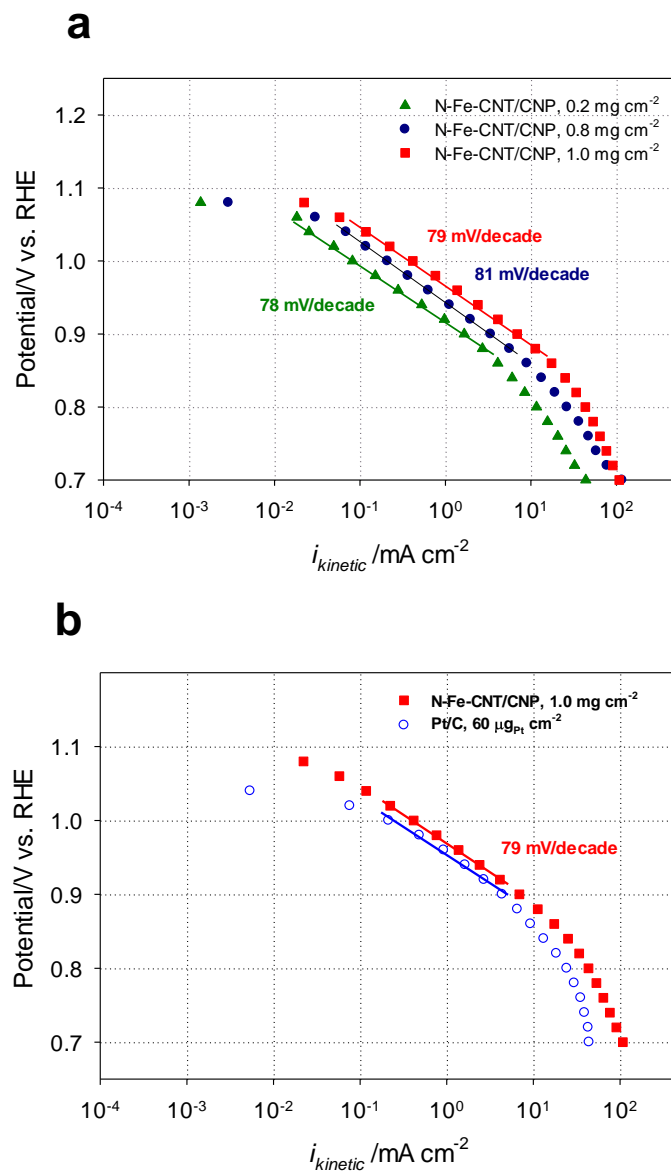

**Supplementary Figure S5.** ORR Tafel plots in  $O_2$ -saturated 0.1 M NaOH. **(a)** Plots for three different N-Fe-CNT/CNP catalyst loadings. **(b)** Comparison between Tafel plots recorded with N-Fe-CNT/CNP catalyst and Pt/C reference catalyst before the cycling test (Tafel slope calculated by linear regression method). The mass transport corrected ORR specific kinetic current density ( $i_{kinetic}$ ) was calculated by the following equation:  $i_{kinetic} = \frac{i_{measured} \times i_{limited}}{i_{limited} - i_{measured}}$

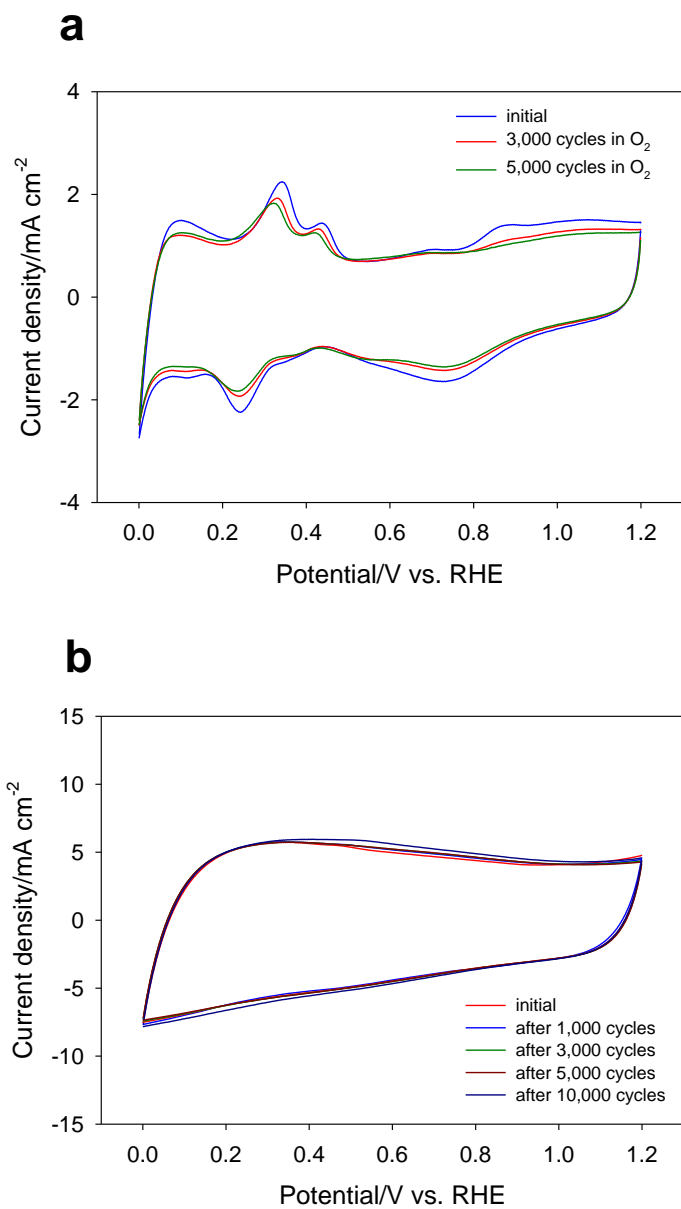

**Supplementary Figure S6.** Cyclic voltammograms in N<sub>2</sub>-saturated electrolyte recorded during the cycling durability test. **(a)** Pt/C catalyst (60 μg<sub>Pt</sub> cm<sup>-2</sup>). **(b)** N-Fe-CNT/CNP catalyst (1.0 mg cm<sup>-2</sup>).

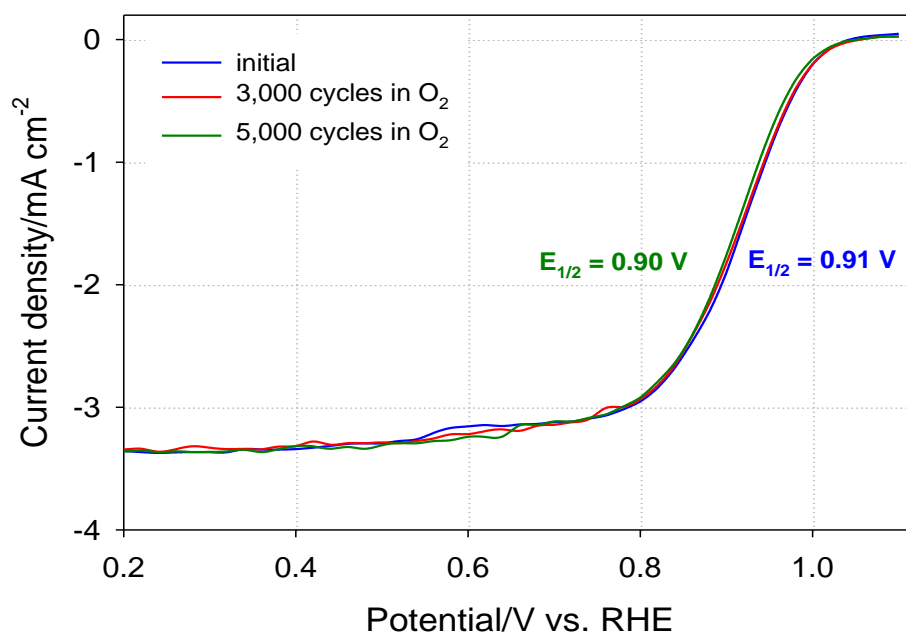

**Supplementary Figure S7.** ORR polarization plots measured with Pt/C ( $60 \mu\text{g}_{\text{Pt}} \text{cm}^{-2}$ ) during cycling durability tests in O<sub>2</sub>-saturated 0.1 M NaOH in the potential range of 0.6-1.0 V vs. RHE. Scan rate 50 mV s<sup>-1</sup>.

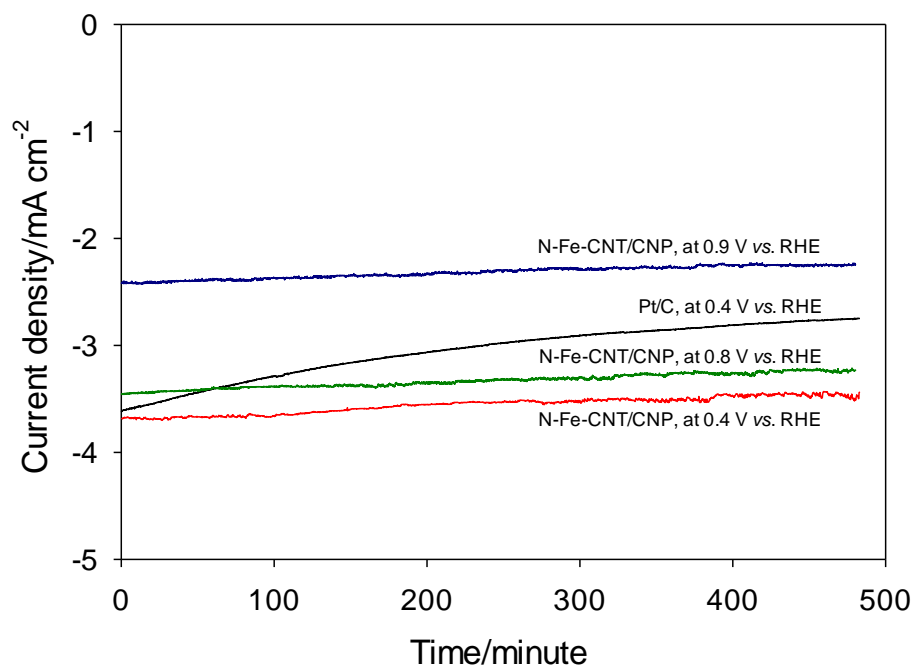

**Supplementary Figure S8.** RDE chronoamperometric stability tests of N-Fe-CNT/CNP and Pt/C catalysts at different potentials. O<sub>2</sub>-saturated 0.1 M NaOH; 900 rpm; 25°C.



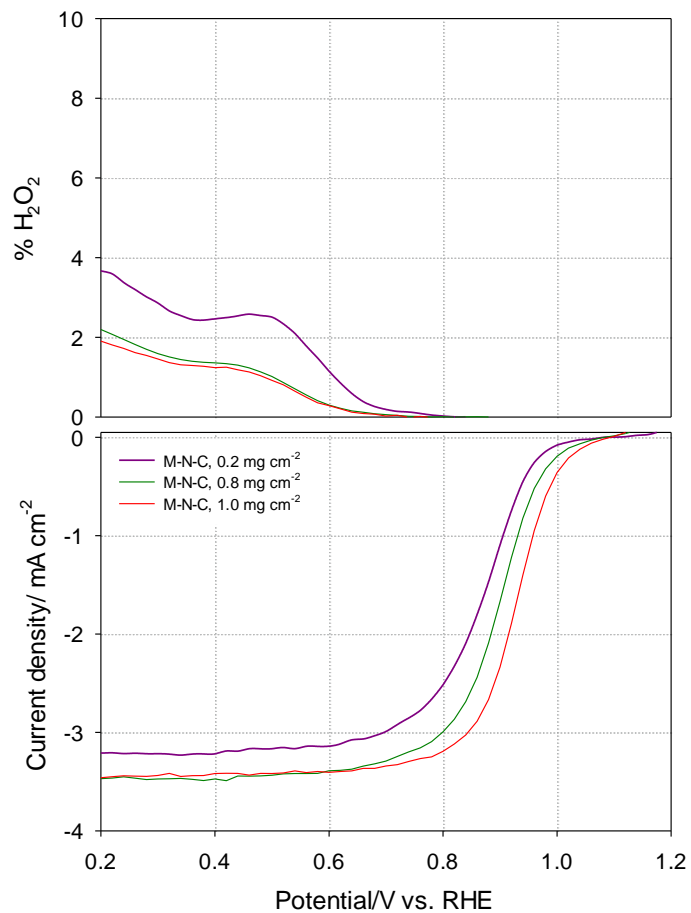

**Supplementary Figure S9.** Dependence of ORR activity and  $\text{H}_2\text{O}_2$  yield on catalyst loading. The percent  $\text{H}_2\text{O}_2$  yield was calculated from the disk current ( $I_D$ ), the ring current ( $I_R$ ), and the collection efficiency ( $N$ ) using the following equation:  $x_{\text{H}_2\text{O}_2}(\%) = \frac{200I_R/N}{I_D + I_R/N}$

**Supplementary Table S1.** Elemental composition of as-received BP 2000 and N-Fe-CNT/CNP catalyst.

| <b>Samples</b>        | <b>Atomic Content, %</b> |      |      |      |       |
|-----------------------|--------------------------|------|------|------|-------|
|                       | C 1s                     | O 1s | N 1s | S 2p | Fe 2p |
| As-received BP 2000   | 95.07                    | 4.72 | -    | 0.21 | -     |
| N-Fe-CNT/CNP catalyst | 92.57                    | 4.01 | 3.09 | 0.24 | 0.08  |
